# Supplementary material
Source: Springer Nature journal article supplement (https://www.springermedizin.de/resource/supplementary/12985_2010_830_MOESM1_ESM.pdf/9609284)
Supplement: MOESM1 [file 9609284]

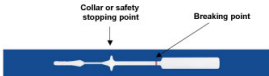

**Paediatric mid-turbinate nasal flocked swabs"code:56750CS01**  
(for less than 2 years or smaller children)

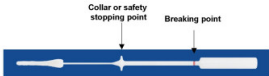

**Older child mid-turbinate nasal flocked swab: code 56380CS01**  
(for children over 2 years and adults)
